# Supplementary material for: An empirical evaluation of two-stage species tree inference strategies using a multilocus dataset from North American pines
Source: PubMed Central journal article supplement (PMC4021425; doi:10.1186/1471-2148-14-67), 2014-03-29
Supplement: 1471-2148-14-67-S2.pdf [file 1471-2148-14-67-S2.pdf]

Supplementary material: an empirical evaluation of two-stage  
species tree inference strategies using a multilocus dataset from  
North American pines

Michael DeGiorgio<sup>1</sup>, John Syring<sup>3</sup>, Andrew J. Eckert<sup>4</sup>, Aaron I. Liston<sup>5</sup>, Richard Cronn<sup>6</sup>,  
David B. Neale<sup>7</sup>, and Noah A. Rosenberg<sup>8</sup>

November 25, 2013

Table S1: Phylogenetic inference strategies

| Index | Species tree inference method | Gene tree inference method | Outgroup species     | Concatenation or consensus | Strictly topology-based |
|-------|-------------------------------|----------------------------|----------------------|----------------------------|-------------------------|
| 1     | Concatenation                 | ML                         | <i>P. gerardiana</i> | Concatenation              | No                      |
| 2     | Concatenation                 | ML                         | <i>P. bungeana</i>   | Concatenation              | No                      |
| 3     | Concatenation                 | ML                         | <i>P. squamata</i>   | Concatenation              | No                      |
| 4     | Concatenation                 | MP                         | <i>P. gerardiana</i> | Concatenation              | No                      |
| 5     | Concatenation                 | MP                         | <i>P. bungeana</i>   | Concatenation              | No                      |
| 6     | Concatenation                 | MP                         | <i>P. squamata</i>   | Concatenation              | No                      |
| 7     | Concatenation                 | NJ                         | <i>P. gerardiana</i> | Concatenation              | No                      |
| 8     | Concatenation                 | NJ                         | <i>P. bungeana</i>   | Concatenation              | No                      |
| 9     | Concatenation                 | NJ                         | <i>P. squamata</i>   | Concatenation              | No                      |
| 10    | Concatenation                 | M                          | <i>P. gerardiana</i> | Concatenation              | No                      |
| 11    | Concatenation                 | M                          | <i>P. bungeana</i>   | Concatenation              | No                      |
| 12    | Concatenation                 | M                          | <i>P. squamata</i>   | Concatenation              | No                      |
| 13    | SMRT                          | ML                         | <i>P. gerardiana</i> | Concatenation              | No                      |
| 14    | SMRT                          | ML                         | <i>P. bungeana</i>   | Concatenation              | No                      |
| 15    | SMRT                          | ML                         | <i>P. squamata</i>   | Concatenation              | No                      |
| 16    | SMRT                          | MP                         | <i>P. gerardiana</i> | Concatenation              | No                      |
| 17    | SMRT                          | MP                         | <i>P. bungeana</i>   | Concatenation              | No                      |
| 18    | SMRT                          | MP                         | <i>P. squamata</i>   | Concatenation              | No                      |
| 19    | SMRT                          | NJ                         | <i>P. gerardiana</i> | Concatenation              | No                      |
| 20    | SMRT                          | NJ                         | <i>P. bungeana</i>   | Concatenation              | No                      |
| 21    | SMRT                          | NJ                         | <i>P. squamata</i>   | Concatenation              | No                      |
| 22    | SMRT                          | M                          | <i>P. gerardiana</i> | Concatenation              | No                      |
| 23    | SMRT                          | M                          | <i>P. bungeana</i>   | Concatenation              | No                      |
| 24    | SMRT                          | M                          | <i>P. squamata</i>   | Concatenation              | No                      |
| 25    | STEAC                         | ML                         | <i>P. gerardiana</i> | Consensus                  | No                      |
| 26    | STEAC                         | ML                         | <i>P. bungeana</i>   | Consensus                  | No                      |
| 27    | STEAC                         | ML                         | <i>P. squamata</i>   | Consensus                  | No                      |
| 28    | STEAC                         | MP                         | <i>P. gerardiana</i> | Consensus                  | No                      |
| 29    | STEAC                         | MP                         | <i>P. bungeana</i>   | Consensus                  | No                      |
| 30    | STEAC                         | MP                         | <i>P. squamata</i>   | Consensus                  | No                      |
| 31    | STEAC                         | NJ                         | <i>P. gerardiana</i> | Consensus                  | No                      |
| 32    | STEAC                         | NJ                         | <i>P. bungeana</i>   | Consensus                  | No                      |
| 33    | STEAC                         | NJ                         | <i>P. squamata</i>   | Consensus                  | No                      |
| 34    | STEAC                         | M                          | <i>P. gerardiana</i> | Consensus                  | No                      |
| 35    | STEAC                         | M                          | <i>P. bungeana</i>   | Consensus                  | No                      |
| 36    | STEAC                         | M                          | <i>P. squamata</i>   | Consensus                  | No                      |
| 37    | STAR                          | ML                         | <i>P. gerardiana</i> | Consensus                  | Yes                     |
| 38    | STAR                          | ML                         | <i>P. bungeana</i>   | Consensus                  | Yes                     |
| 39    | STAR                          | ML                         | <i>P. squamata</i>   | Consensus                  | Yes                     |
| 40    | STAR                          | MP                         | <i>P. gerardiana</i> | Consensus                  | Yes                     |
| 41    | STAR                          | MP                         | <i>P. bungeana</i>   | Consensus                  | Yes                     |
| 42    | STAR                          | MP                         | <i>P. squamata</i>   | Consensus                  | Yes                     |
| 43    | STAR                          | NJ                         | <i>P. gerardiana</i> | Consensus                  | Yes                     |
| 44    | STAR                          | NJ                         | <i>P. bungeana</i>   | Consensus                  | Yes                     |
| 45    | STAR                          | NJ                         | <i>P. squamata</i>   | Consensus                  | Yes                     |
| 46    | STAR                          | M                          | <i>P. gerardiana</i> | Consensus                  | Yes                     |
| 47    | STAR                          | M                          | <i>P. bungeana</i>   | Consensus                  | Yes                     |
| 48    | STAR                          | M                          | <i>P. squamata</i>   | Consensus                  | Yes                     |
| 49    | RTC                           | ML                         | <i>P. gerardiana</i> | Consensus                  | Yes                     |
| 50    | RTC                           | ML                         | <i>P. bungeana</i>   | Consensus                  | Yes                     |
| 51    | RTC                           | ML                         | <i>P. squamata</i>   | Consensus                  | Yes                     |
| 52    | RTC                           | MP                         | <i>P. gerardiana</i> | Consensus                  | Yes                     |
| 53    | RTC                           | MP                         | <i>P. bungeana</i>   | Consensus                  | Yes                     |
| 54    | RTC                           | MP                         | <i>P. squamata</i>   | Consensus                  | Yes                     |
| 55    | RTC                           | NJ                         | <i>P. gerardiana</i> | Consensus                  | Yes                     |
| 56    | RTC                           | NJ                         | <i>P. bungeana</i>   | Consensus                  | Yes                     |
| 57    | RTC                           | NJ                         | <i>P. squamata</i>   | Consensus                  | Yes                     |
| 58    | RTC                           | M                          | <i>P. gerardiana</i> | Consensus                  | Yes                     |
| 59    | RTC                           | M                          | <i>P. bungeana</i>   | Consensus                  | Yes                     |
| 60    | RTC                           | M                          | <i>P. squamata</i>   | Consensus                  | Yes                     |
| 61    | MDC                           | ML                         | <i>P. gerardiana</i> | Consensus                  | Yes                     |
| 62    | MDC                           | ML                         | <i>P. bungeana</i>   | Consensus                  | Yes                     |
| 63    | MDC                           | ML                         | <i>P. squamata</i>   | Consensus                  | Yes                     |
| 64    | MDC                           | MP                         | <i>P. gerardiana</i> | Consensus                  | Yes                     |
| 65    | MDC                           | MP                         | <i>P. bungeana</i>   | Consensus                  | Yes                     |
| 66    | MDC                           | MP                         | <i>P. squamata</i>   | Consensus                  | Yes                     |
| 67    | MDC                           | NJ                         | <i>P. gerardiana</i> | Consensus                  | Yes                     |
| 68    | MDC                           | NJ                         | <i>P. bungeana</i>   | Consensus                  | Yes                     |
| 69    | MDC                           | NJ                         | <i>P. squamata</i>   | Consensus                  | Yes                     |
| 70    | MDC                           | M                          | <i>P. gerardiana</i> | Consensus                  | Yes                     |
| 71    | MDC                           | M                          | <i>P. bungeana</i>   | Consensus                  | Yes                     |
| 72    | MDC                           | M                          | <i>P. squamata</i>   | Consensus                  | Yes                     |

**TABLE S2.** Sampled *Pinus* subsection *Strobus* (ingroup) and *Gerardianae* (outgroup) representatives. Dashes indicate missing data.

| Sample id | Species                           | Subsection     | State <sup>a</sup> | Country   | Latitude | Longitude |
|-----------|-----------------------------------|----------------|--------------------|-----------|----------|-----------|
| Pial.ao   | <i>P. albicaulis</i>              | <i>Strobus</i> | ---                | ---       | ---      | ---       |
| Pial-2    | <i>P. albicaulis</i>              | <i>Strobus</i> | British Columbia   | Canada    | 54.880   | -125.374  |
| Pial-3    | <i>P. albicaulis</i>              | <i>Strobus</i> | Alberta            | Canada    | 53.707   | -119.607  |
| Pial-4    | <i>P. albicaulis</i>              | <i>Strobus</i> | British Columbia   | Canada    | 50.095   | -122.899  |
| Pial-5    | <i>P. albicaulis</i>              | <i>Strobus</i> | British Columbia   | Canada    | 49.370   | -119.921  |
| Pial-6    | <i>P. albicaulis</i>              | <i>Strobus</i> | Alberta            | Canada    | 49.366   | -114.252  |
| Pial-7    | <i>P. albicaulis</i>              | <i>Strobus</i> | Washington         | USA       | 48.707   | -118.472  |
| Pial-8    | <i>P. albicaulis</i>              | <i>Strobus</i> | Washington         | USA       | 48.311   | -120.565  |
| Pial-9    | <i>P. albicaulis</i>              | <i>Strobus</i> | Washington         | USA       | 47.821   | -123.134  |
| Pial-10   | <i>P. albicaulis</i>              | <i>Strobus</i> | Washington         | USA       | 46.244   | -121.474  |
| Pial-12   | <i>P. albicaulis</i>              | <i>Strobus</i> | Montana            | USA       | 45.042   | -109.451  |
| Pial-13   | <i>P. albicaulis</i>              | <i>Strobus</i> | Oregon             | USA       | 44.723   | -118.575  |
| Pial-15   | <i>P. albicaulis</i>              | <i>Strobus</i> | Montana            | USA       | 44.543   | -111.409  |
| Pial-16   | <i>P. albicaulis</i>              | <i>Strobus</i> | California         | USA       | 41.798   | -122.158  |
| Pial-17   | <i>P. albicaulis</i>              | <i>Strobus</i> | Oregon             | USA       | 43.380   | -121.570  |
| Piay-1    | <i>P. ayacahuite</i> <sup>b</sup> | <i>Strobus</i> | La Paz             | Honduras  | 14.117   | -87.817   |
| Piay-2    | <i>P. ayacahuite</i> <sup>b</sup> | <i>Strobus</i> | Ocotepeque         | Honduras  | 14.417   | -89.133   |
| Piay-3    | <i>P. ayacahuite</i> <sup>b</sup> | <i>Strobus</i> | Totonicapan        | Guatemala | 14.933   | -91.350   |
| Piay-4    | <i>P. ayacahuite</i> <sup>b</sup> | <i>Strobus</i> | Chiapas            | Mexico    | 16.617   | -92.367   |
| Piay-5    | <i>P. ayacahuite</i> <sup>b</sup> | <i>Strobus</i> | Oaxaca             | Mexico    | 17.150   | -97.633   |
| Piay-6    | <i>P. ayacahuite</i> <sup>c</sup> | <i>Strobus</i> | Puebla             | Mexico    | 19.167   | -98.583   |
| Piay-7    | <i>P. ayacahuite</i> <sup>d</sup> | <i>Strobus</i> | Estado de Mexico   | Mexico    | 19.167   | -98.800   |
| Piay-8    | <i>P. ayacahuite</i> <sup>c</sup> | <i>Strobus</i> | Michoacan          | Mexico    | 19.600   | -102.330  |
| Piay-9    | <i>P. ayacahuite</i> <sup>c</sup> | <i>Strobus</i> | Jalisco            | Mexico    | 20.383   | -105.067  |
| Piay-10   | <i>P. ayacahuite</i> <sup>c</sup> | <i>Strobus</i> | Aguascalientes     | Mexico    | 19.600   | -99.767   |
| Piay-13   | <i>P. ayacahuite</i> <sup>d</sup> | <i>Strobus</i> | Coahuila           | Mexico    | 25.233   | -100.433  |
| Piay-14   | <i>P. ayacahuite</i> <sup>b</sup> | <i>Strobus</i> | Chiapas            | Mexico    | 15.417   | -92.333   |
| Piay-15   | <i>P. ayacahuite</i> <sup>b</sup> | <i>Strobus</i> | Oaxaca             | Mexico    | 17.400   | -96.483   |
| Piay-16   | <i>P. ayacahuite</i> <sup>b</sup> | <i>Strobus</i> | Chiapas            | Mexico    | 16.300   | -93.283   |
| Piay-17   | <i>P. ayacahuite</i> <sup>b</sup> | <i>Strobus</i> | Huehuetenango      | Guatemala | 15.733   | -91.458   |
| Piay-18   | <i>P. ayacahuite</i> <sup>d</sup> | <i>Strobus</i> | Nuevo Leon         | Mexico    | 25.233   | -100.433  |
| Piay-19   | <i>P. ayacahuite</i> <sup>d</sup> | <i>Strobus</i> | Nuevo Leon         | Mexico    | 25.883   | -100.217  |
| Pist-16   | <i>P. chiapensis</i>              | <i>Strobus</i> | ---                | Mexico    | ---      | ---       |
| Pist-17   | <i>P. chiapensis</i>              | <i>Strobus</i> | Huehuetenango      | Guatemala | 15.800   | -91.300   |
| Pist-18   | <i>P. chiapensis</i>              | <i>Strobus</i> | Oaxaca             | Mexico    | 17.217   | -97.983   |
| Pifl-1    | <i>P. flexilis</i>                | <i>Strobus</i> | British Columbia   | Canada    | 50.000   | -115.500  |
| Pifl-2    | <i>P. flexilis</i>                | <i>Strobus</i> | Alberta            | Canada    | 52.254   | -116.397  |
| Pifl-3    | <i>P. flexilis</i>                | <i>Strobus</i> | Alberta            | Canada    | 49.083   | -114.230  |
| Pifl-4    | <i>P. flexilis</i>                | <i>Strobus</i> | Utah               | USA       | 37.658   | -112.708  |
| Pifl-5    | <i>P. flexilis</i>                | <i>Strobus</i> | Utah               | USA       | 37.017   | -110.867  |
| Pifl-8    | <i>P. flexilis</i>                | <i>Strobus</i> | Nevada             | USA       | 36.333   | -115.683  |
| Pifl-9    | <i>P. flexilis</i>                | <i>Strobus</i> | New Mexico         | USA       | 36.333   | -105.667  |
| Pifl-10   | <i>P. flexilis</i>                | <i>Strobus</i> | New Mexico         | USA       | 35.216   | -106.450  |
| Pifl-11   | <i>P. flexilis</i>                | <i>Strobus</i> | Colorado           | USA       | 38.733   | -104.950  |
| Pifl-12   | <i>P. flexilis</i>                | <i>Strobus</i> | Colorado           | USA       | 37.650   | -106.650  |
| Pifl-13   | <i>P. flexilis</i>                | <i>Strobus</i> | Colorado           | USA       | 37.367   | -108.067  |
| Pifl-14   | <i>P. flexilis</i>                | <i>Strobus</i> | Colorado           | USA       | 36.490   | -106.367  |
| Pifl-15   | <i>P. flexilis</i>                | <i>Strobus</i> | California         | USA       | 36.383   | -118.183  |
| Pifl-16   | <i>P. flexilis</i>                | <i>Strobus</i> | Colorado           | USA       | ---      | ---       |
| Pifl-17   | <i>P. flexilis</i>                | <i>Strobus</i> | Colorado           | USA       | ---      | ---       |
| Pila-17   | <i>P. lambertiana</i>             | <i>Strobus</i> | California         | USA       | 41.687   | -123.831  |
| Pila-18   | <i>P. lambertiana</i>             | <i>Strobus</i> | California         | USA       | 39.494   | -122.640  |
| Pila-19   | <i>P. lambertiana</i>             | <i>Strobus</i> | California         | USA       | 35.468   | -115.692  |
| Pila-20   | <i>P. lambertiana</i>             | <i>Strobus</i> | California         | USA       | 34.429   | -115.193  |
| Pila-21   | <i>P. lambertiana</i>             | <i>Strobus</i> | California         | USA       | 36.790   | -118.929  |
| Pila-22   | <i>P. lambertiana</i>             | <i>Strobus</i> | California         | USA       | 35.478   | -118.599  |
| Pila-23   | <i>P. lambertiana</i>             | <i>Strobus</i> | Oregon             | USA       | 42.450   | -120.680  |

|         |                                     |                    |                              |          |        |          |
|---------|-------------------------------------|--------------------|------------------------------|----------|--------|----------|
| Pila-24 | <i>P. lambertiana</i>               | <i>Strobus</i>     | California                   | USA      | 34.606 | -119.309 |
| Pila-26 | <i>P. lambertiana</i>               | <i>Strobus</i>     | Baja California              | Mexico   | 31.000 | -115.500 |
| Pila-27 | <i>P. lambertiana</i>               | <i>Strobus</i>     | California                   | USA      | 41.473 | -121.159 |
| Pila-28 | <i>P. lambertiana</i>               | <i>Strobus</i>     | Oregon                       | USA      | 44.980 | -121.850 |
| Pila-29 | <i>P. lambertiana</i>               | <i>Strobus</i>     | California                   | USA      | ---    | ---      |
| Pimn-1  | <i>P. monticola</i>                 | <i>Strobus</i>     | California                   | USA      | 41.565 | -121.517 |
| Pimn-2  | <i>P. monticola</i>                 | <i>Strobus</i>     | California                   | USA      | ---    | ---      |
| Pimn-3  | <i>P. monticola</i>                 | <i>Strobus</i>     | California                   | USA      | 38.975 | -120.284 |
| Pimn-4  | <i>P. monticola</i>                 | <i>Strobus</i>     | California                   | USA      | 36.046 | -118.349 |
| Pimn-5  | <i>P. monticola</i>                 | <i>Strobus</i>     | California                   | USA      | ---    | ---      |
| Pimn-6  | <i>P. monticola</i>                 | <i>Strobus</i>     | California                   | USA      | ---    | ---      |
| Pimn-7  | <i>P. monticola</i>                 | <i>Strobus</i>     | California                   | USA      | ---    | ---      |
| Pimn-8  | <i>P. monticola</i>                 | <i>Strobus</i>     | California                   | USA      | 39.266 | -120.242 |
| Pimn-9  | <i>P. monticola</i>                 | <i>Strobus</i>     | Oregon                       | USA      | 42.033 | -122.942 |
| Pimn-10 | <i>P. monticola</i>                 | <i>Strobus</i>     | California                   | USA      | ---    | ---      |
| Pimn-11 | <i>P. monticola</i>                 | <i>Strobus</i>     | Washington                   | USA      | 48.736 | -117.220 |
| Pimn-12 | <i>P. monticola</i>                 | <i>Strobus</i>     | Oregon                       | USA      | 42.372 | -124.290 |
| Pimn-13 | <i>P. monticola</i>                 | <i>Strobus</i>     | Oregon                       | USA      | 45.131 | -111.683 |
| Pimn-14 | <i>P. monticola</i>                 | <i>Strobus</i>     | Washington                   | USA      | 46.150 | -122.000 |
| Pimn-15 | <i>P. monticola</i>                 | <i>Strobus</i>     | Washington                   | USA      | 47.400 | -123.000 |
| Pimn-16 | <i>P. monticola</i>                 | <i>Strobus</i>     | Oregon                       | USA      | 44.260 | -122.000 |
| Pimn-17 | <i>P. monticola</i>                 | <i>Strobus</i>     | Idaho                        | USA      | 47.250 | -116.000 |
| Pimn-18 | <i>P. monticola</i>                 | <i>Strobus</i>     | Montana                      | USA      | 48.367 | -113.933 |
| Pisb-1  | <i>P. strobiformis</i>              | <i>Strobus</i>     | Colorado                     | USA      | 37.417 | -107.000 |
| Pisb-2  | <i>P. strobiformis</i>              | <i>Strobus</i>     | Arizona                      | USA      | 37.282 | -110.821 |
| Pisb-3  | <i>P. strobiformis</i>              | <i>Strobus</i>     | New Mexico                   | USA      | 35.917 | -108.667 |
| Pisb-4  | <i>P. strobiformis</i>              | <i>Strobus</i>     | Arizona                      | USA      | 35.317 | -111.700 |
| Pisb-5  | <i>P. strobiformis</i>              | <i>Strobus</i>     | New Mexico                   | USA      | 35.142 | -108.145 |
| Pisb-6  | <i>P. strobiformis</i>              | <i>Strobus</i>     | Arizona                      | USA      | 34.330 | -111.417 |
| Pisb-7  | <i>P. strobiformis</i>              | <i>Strobus</i>     | Arizona                      | USA      | 34.108 | -109.567 |
| Pisb-8  | <i>P. strobiformis</i>              | <i>Strobus</i>     | New Mexico                   | USA      | 33.833 | -108.833 |
| Pisb-9  | <i>P. strobiformis</i>              | <i>Strobus</i>     | New Mexico                   | USA      | 33.167 | -107.467 |
| Pisb-10 | <i>P. strobiformis</i>              | <i>Strobus</i>     | New Mexico                   | USA      | 32.917 | -105.750 |
| Pisb-11 | <i>P. strobiformis</i>              | <i>Strobus</i>     | New Mexico                   | USA      | 32.750 | -107.583 |
| Pisb-12 | <i>P. strobiformis</i>              | <i>Strobus</i>     | Arizona                      | USA      | 32.667 | -109.867 |
| Pisb-13 | <i>P. strobiformis</i>              | <i>Strobus</i>     | Arizona                      | USA      | 32.443 | -110.788 |
| Pisb-14 | <i>P. strobiformis</i> <sup>o</sup> | <i>Strobus</i>     | Coahuila                     | Mexico   | 25.233 | -100.433 |
| Pisb-15 | <i>P. strobiformis</i> <sup>o</sup> | <i>Strobus</i>     | Nuevo Leon                   | Mexico   | 24.883 | -100.217 |
| Pisb-16 | <i>P. strobiformis</i>              | <i>Strobus</i>     | New Mexico                   | USA      | 32.800 | -105.800 |
| Pisb-17 | <i>P. strobiformis</i>              | <i>Strobus</i>     | Arizona                      | USA      | 34.447 | -111.358 |
| Pisb-18 | <i>P. strobiformis</i>              | <i>Strobus</i>     | Nuevo Leon                   | Mexico   | 24.883 | -100.217 |
| Pist-1  | <i>P. strobus</i>                   | <i>Strobus</i>     | Newfoundland and<br>Labrador | Canada   | 48.520 | -54.200  |
| Pist-2  | <i>P. strobus</i>                   | <i>Strobus</i>     | Ontario                      | Canada   | 47.530 | -83.100  |
| Pist-3  | <i>P. strobus</i>                   | <i>Strobus</i>     | Minnesota                    | USA      | 47.402 | -94.438  |
| Pist-4  | <i>P. strobus</i>                   | <i>Strobus</i>     | Quebec                       | Canada   | 47.160 | -72.580  |
| Pist-5  | <i>P. strobus</i>                   | <i>Strobus</i>     | New Brunswick                | Canada   | 46.480 | -66.070  |
| Pist-6  | <i>P. strobus</i>                   | <i>Strobus</i>     | Michigan                     | USA      | 46.377 | -84.657  |
| Pist-7  | <i>P. strobus</i>                   | <i>Strobus</i>     | Wisconsin                    | USA      | 46.108 | -90.944  |
| Pist-8  | <i>P. strobus</i>                   | <i>Strobus</i>     | Ontario                      | Canada   | 45.590 | -77.230  |
| Pist-9  | <i>P. strobus</i>                   | <i>Strobus</i>     | Maine                        | USA      | 44.580 | -67.050  |
| Pist-10 | <i>P. strobus</i>                   | <i>Strobus</i>     | Nova Scotia                  | Canada   | 44.410 | -65.220  |
| Pist-11 | <i>P. strobus</i>                   | <i>Strobus</i>     | Vermont                      | USA      | 44.290 | -73.060  |
| Pist-12 | <i>P. strobus</i>                   | <i>Strobus</i>     | Wisconsin                    | USA      | 42.988 | -90.668  |
| Pist-13 | <i>P. strobus</i>                   | <i>Strobus</i>     | New York                     | USA      | 42.150 | -76.450  |
| Pist-14 | <i>P. strobus</i>                   | <i>Strobus</i>     | Pennsylvania                 | USA      | 41.100 | -82.150  |
| Pist-15 | <i>P. strobus</i>                   | <i>Strobus</i>     | North Carolina               | USA      | 35.800 | -82.700  |
| Pist-19 | <i>P. strobus</i>                   | <i>Strobus</i>     | Pennsylvania                 | USA      | ---    | ---      |
| Pibu-1  | <i>P. bungeana</i>                  | <i>Gerardianae</i> | ---                          | ---      | ---    | ---      |
| Pige-1  | <i>P. gerardiana</i>                | <i>Gerardianae</i> | ---                          | ---      | ---    | ---      |
| Pige-2  | <i>P. gerardiana</i>                | <i>Gerardianae</i> | Gilgit                       | Pakistan | 35.386 | 74.838   |
| Pisq-1  | <i>P. squamata</i>                  | <i>Gerardianae</i> | NE Yunnan                    | China    | 26.869 | 103.013  |

|        |                    |                   |           |       |       |         |
|--------|--------------------|-------------------|-----------|-------|-------|---------|
| Pisq-2 | <i>P. squamata</i> | <i>Gerardiana</i> | NE Yunnan | China | 26.87 | 103.014 |
|--------|--------------------|-------------------|-----------|-------|-------|---------|

---

<sup>a</sup>State, province or department depending on the country of origin.

<sup>b</sup>*P. ayacahuite* var. *ayacahuite*

<sup>c</sup>*P. ayacahuite* var. *veitchii*

<sup>d</sup>*P. ayacahuite* var. *brachyptera*

<sup>e</sup>Putatively *P. ayacahuite* var. *brachyptera*

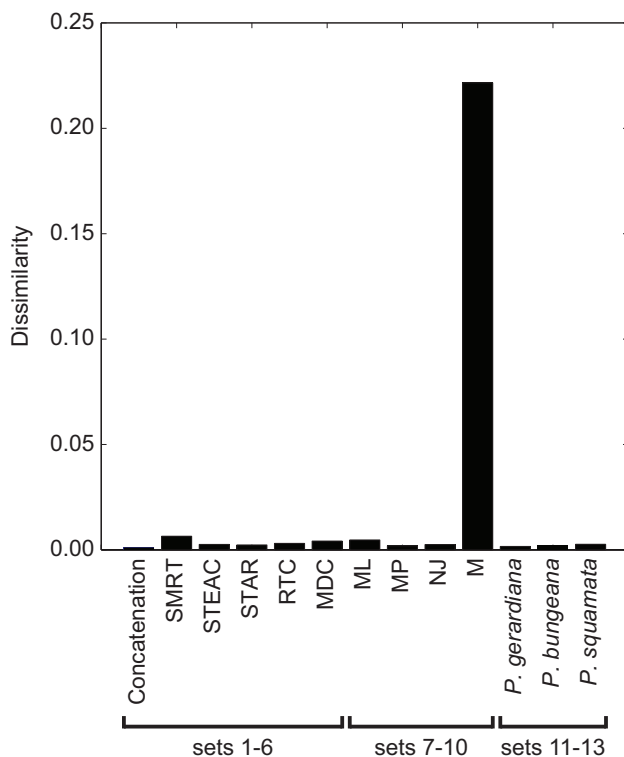

Figure S1: Procrustes analysis of the influence of specific features of phylogenetic strategies on principal component plots. Principal components analysis of phylogenetic inference strategies was performed as in Figure 4 with the exception that it was applied to each of 13 subsets  $\mathcal{F}_1, \mathcal{F}_2, \dots, \mathcal{F}_{13}$  of phylogenetic inference strategies for which one feature of a strategy was removed.  $\mathcal{F}_1, \mathcal{F}_2, \dots, \mathcal{F}_6$  are subsets containing 60 strategies, in which one of the six species tree construction methods is not included,  $\mathcal{F}_7, \mathcal{F}_8, \dots, \mathcal{F}_{10}$  are subsets containing 54 strategies, in which one of the four gene tree inference methods is not included, and  $\mathcal{F}_{11}, \mathcal{F}_{12}, \mathcal{F}_{13}$  are subsets containing 48 strategies, in which one of the three outgroup species is not included. In other words, we performed principal components analysis on 13 different datasets: six in which a species tree construction method was removed (Concatenation, SMRT, STEAC, STAR, RTC, and MDC), four in which a gene tree inference method was removed (ML, MP, NJ, and M), and three in which an outgroup was removed (*P. gerardiana*, *P. bungeana*, and *P. squamata*). The results of each principal components analysis were projected into the two-dimensional plane spanned by their first and second principal components. The points in each two-dimensional plane were compared to the points in Figure 4A through Procrustes analysis. Each comparison gives a dissimilarity score computed using eq. 3.
